# Supplementary material for: Toward strong self-healing polyisoprene elastomers with dynamic ionic crosslinks
Source: Royal Society of Chemistry journal article supplement (doi:10.1039/d0sm00058b), 2020-01-01
Supplement: d0sm00058b1.pdf [file d0sm00058b1.pdf]

# **Toward Strong Self-Healing Polyisoprene Elastomers with Dynamic Ionic Crosslinks**

*Yohei Miwa,<sup>1, †, \*</sup> Junosuke Kurachi,<sup>1</sup> Yusuke Sugino,<sup>1</sup> Taro Udagawa,<sup>1</sup> and Shoichi Kutsumizu<sup>1</sup>*

<sup>1</sup>Department of Chemistry and Biomolecular Science, Faculty of Engineering, Gifu University,  
Yanagido, Gifu 501-1193, Japan.

<sup>†</sup>PRESTO, Japan Science and Technology Agency.

\*Author to whom correspondence should be addressed.

**E-mail: [y\\_miwa@gifu-u.ac.jp](mailto:y_miwa@gifu-u.ac.jp)**

**Table of Contents**

<Supplementary Figures>

**Figure S1.** FT-IR spectra for the indicated samples. The degree of neutralization of the samples was determined from reduction of band intensity of  $\nu(\text{C}=\text{O})$  of  $\text{COOH}$  group at  $1707\text{ cm}^{-1}$  and  $1744\text{ cm}^{-1}$  normalized by the band intensity of  $\nu(\text{C}=\text{C})$ . By the neutralization,  $\nu(\text{O}-\text{C}-\text{O}^-)$  of sodium carboxylate was generated at  $1590\text{ cm}^{-1}$ .

**Figure S2.** (A) The chemical structures for isoprene trimers containing a carboxy group and a sodium carboxylate group. These model trimers are used for the calculation. Dimer for each combination with lowest energy DFT calculation result for (B)  $-\text{COOH}\cdots\text{HOOC}-$ , (C)  $-\text{COONa}\cdots\text{HOOC}-$ , and (D)  $-\text{COONa}\cdots\text{NaOOC}-$  is presented.

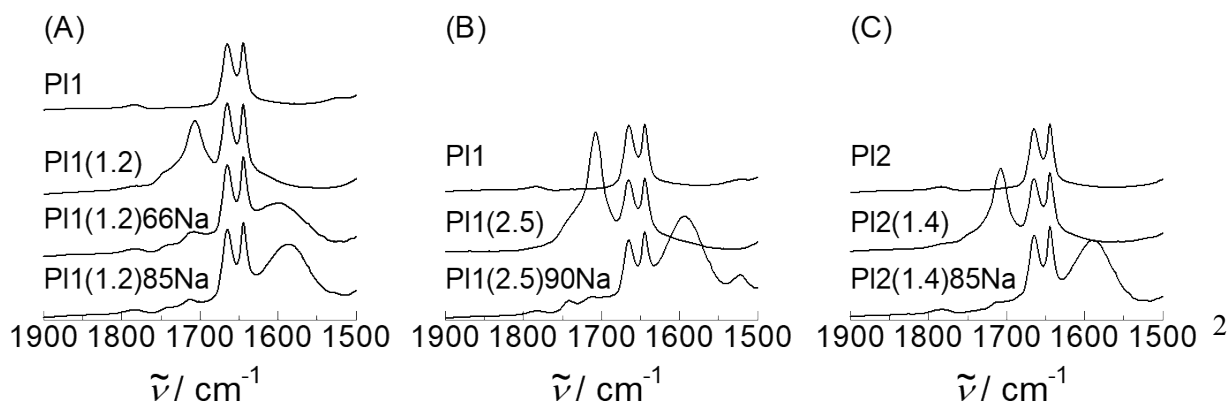



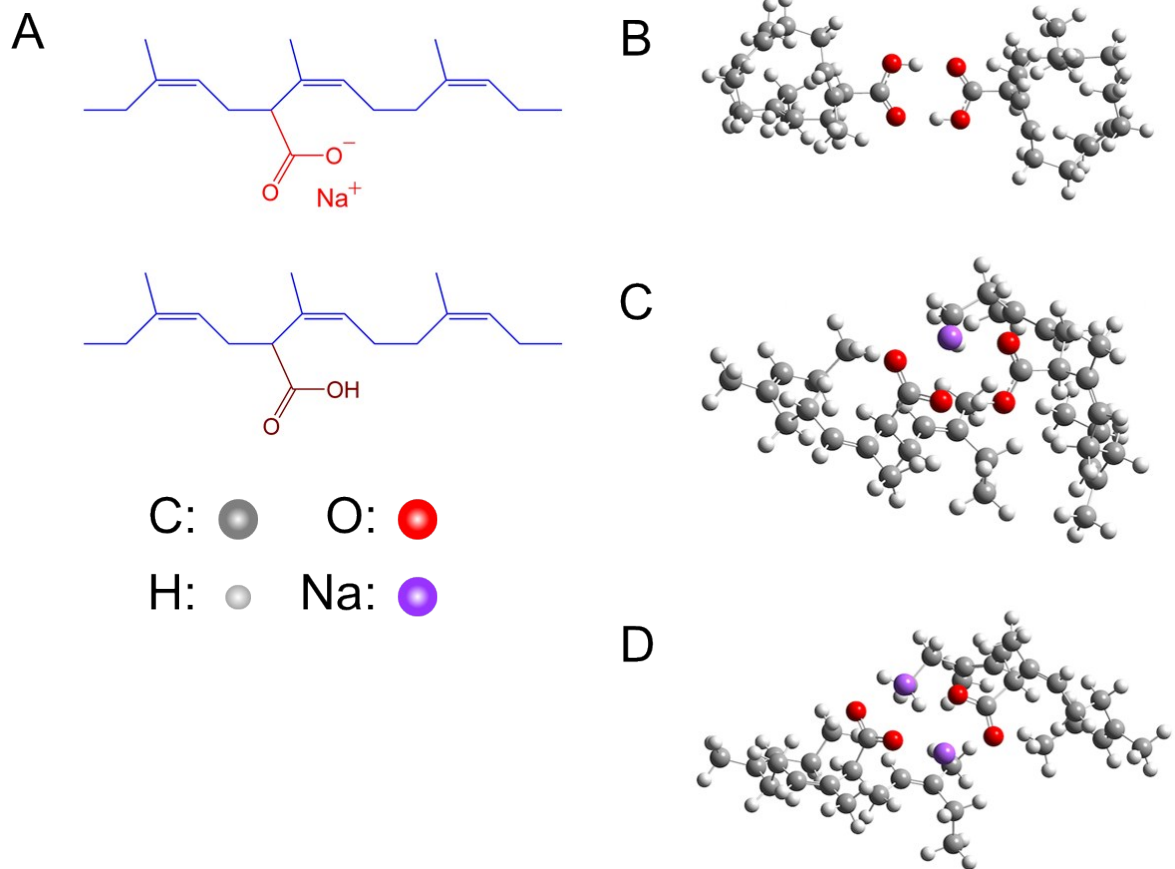

**Figure S2.** (A) The chemical structures for isoprene trimers containing a carboxy group and a sodium carboxylate group. These model trimers are used for the calculation. Dimer for each combination with lowest energy DFT calculation result for (B)  $\text{-COOH} \cdots \text{HOOC-}$ , (C)  $\text{-COONa} \cdots \text{HOOC-}$ , and (D)  $\text{-COONa} \cdots \text{NaOOC-}$  is presented.
